# Supplementary material
Source: PubMed Central journal article supplement (PMC4784543)
Supplement: haad004821.wt1_default.pdf [file haad004821.wt1_default.pdf]

**Appendix Table 1:** Tocolytic trials included in the study

| Lead Author Name                 | Year | Total Number of Subjects | Comparison                                                         | Adequate sequence generation | Allocation concealment | Subject or personnel blinding | Outcome assessor blinding | Incomplete outcome data addressed | Free of selective reporting | Free of other bias | Quality Score | Final Quality Assessment |
|----------------------------------|------|--------------------------|--------------------------------------------------------------------|------------------------------|------------------------|-------------------------------|---------------------------|-----------------------------------|-----------------------------|--------------------|---------------|--------------------------|
| Adam                             | 1966 | 51                       | Placebo v Isoxuprine                                               | 0                            | 0                      | +                             | +                         | +                                 | +                           | +                  | 5             | 0                        |
| Al-Omari                         | 2006 | 63                       | Nifedipine v Atosiban                                              | -                            | -                      | -                             | 0                         | +                                 | +                           | +                  | 3             | 0                        |
| Al-Qattan                        | 2000 | 60                       | Nifedipine v Ritodrine                                             | +                            | 0                      | 0                             | 0                         | +                                 | +                           | +                  | 4             | 1                        |
| Amorim                           | 2009 | 50                       | Notroglycerine v Nifedipine                                        | +                            | +                      | -                             | +                         | 0                                 | +                           | +                  | 5             | 1                        |
| Aramayo                          | 1990 | 29                       | Magnesium Sulfate v Terbutaline                                    | 0                            | 0                      | 0                             | 0                         | +                                 | +                           | +                  | 3             | 0                        |
| Beall                            | 1985 | 131                      | Magnesium Sulfate v Ritodrine v Terbutaline                        | +                            | +                      | -                             | 0                         | +                                 | +                           | +                  | 5             | 1                        |
| Besinger                         | 1991 | 40                       | Indomethacin v Ritodrine                                           | +                            | +                      | 0                             | 0                         | +                                 | +                           | +                  | 5             | 1                        |
| Bisits                           | 2004 | 238                      | Glyceryl trinitrate v Betamimetic (either salbutamol or ritodrine) | +                            | +                      | 0                             | 0                         | +                                 | -                           | +                  | 4             | 1                        |
| Borna                            | 2007 | 104                      | Celecoxib v Magnesium Sulfate                                      | +                            | +                      | +                             | +                         | +                                 | +                           | +                  | 7             | 1                        |
| Canadian PTL Investigators Group | 1992 | 708                      | Ritodrine v Dextrose solution                                      | +                            | +                      | +                             | +                         | +                                 | +                           | +                  | 7             | 1                        |
| Cararach                         | 2006 | 80                       | Ritodrine v Nifedipine                                             | 0                            | +                      | -                             | 0                         | +                                 | -                           | +                  | 3             | 0                        |
| Caritis                          | 1984 | 100                      | Terbutaline v Ritodrine                                            | +                            | +                      | +                             | +                         | +                                 | +                           | +                  | 7             | 1                        |
| Csapo                            | 1977 | 36                       | Placebo v Isoxsuprine                                              | 0                            | 0                      | +                             | +                         | +                                 | +                           | +                  | 5             | 0                        |
| Chau                             | 1992 | 98                       | Magnesium Sulfate v Terbutaline                                    | -                            | -                      | 0                             | 0                         | +                                 | +                           | +                  | 3             | 0                        |
| Cotton                           | 1984 | 54                       | Magnesium Sulfate v Terbutaline v Dextrose                         | 0                            | 0                      | 0                             | 0                         | -                                 | +                           | +                  | 2             | 0                        |
| Cox                              | 1990 | 156                      | Magnesium Sulfate v Placebo                                        | +                            | +                      | 0                             | 0                         | +                                 | +                           | +                  | 5             | 1                        |
| El-Sayed                         | 1999 | 31                       | Magnesium Sulfate v                                                | +                            | +                      | 0                             | 0                         | +                                 | +                           | +                  | 5             | 1                        |

|                                                |      |     |                                |   |   |   |   |   |   |   |   |   |
|------------------------------------------------|------|-----|--------------------------------|---|---|---|---|---|---|---|---|---|
|                                                |      |     | Nitroglycerin                  |   |   |   |   |   |   |   |   |   |
| Essed                                          | 1978 | 96  | Ritodrine v Fenoterol          | 0 | 0 | 0 | 0 | + | - | + | 2 | 0 |
| European Atosiban Study Group                  | 2001 | 245 | Atosiban v Terbutaline         | + | 0 | + | + | + | + | + | 6 | 1 |
| Fan                                            | 2003 | 61  | Nifedipine v Ritodrine         | 0 | 0 | 0 | 0 | + | + | + | 3 | 0 |
| Floyd                                          | 1995 | 90  | Magnesium Sulfate v Nifedipine | + | 0 | 0 | 0 | + | + | + | 5 | 1 |
| French/Australian Atosiban Investigators Group | 2001 | 241 | Atosiban v Salbutamol          | + | + | + | + | + | + | + | 6 | 1 |
| Garcia-Velasco                                 | 1998 | 140 | Nifedipine v Ritodrine         | + | 0 | 0 | 0 | - | + | + | 3 | 0 |
| Glock                                          | 1993 | 80  | Nifedipine v Magnesium Sulfate | 0 | 0 | 0 | 0 | + | + | + | 3 | 0 |
| Goodwin                                        | 1994 | 112 | Placebo v Atosiban             | + | + | + | + | + | + | + | 7 | 1 |
| Goodwin                                        | 1996 | 302 | Atosiban v Ritodrine           | + | + | + | + | + | + | + | 7 | 1 |
| Grignaffini                                    | 2007 | 91  | Atosiban v Ritodrine           | 0 | 0 | 0 | 0 | + | + | + | 3 | 0 |
| Gummerus                                       | 1983 | 140 | Hexoprenaline v Salbutamol     | 0 | 0 | 0 | 0 | + | + | + | 3 | 0 |
| Haghighi                                       | 1999 | 74  | Nifedipine v Magnesium Sulfate | 0 | 0 | 0 | 0 | + | + | + | 3 | 0 |
| Hollander                                      | 1987 | 70  | Magnesium Sulfate v Ritodrine  | + | 0 | 0 | 0 | + | + | + | 4 | 1 |
| Holleboom                                      | 1996 | 201 | Ritodrine v Ritodrine          | 0 | + | + | + | + | + | + | 6 | 1 |
| How                                            | 2006 | 54  | Placebo v Magnesium Sulfate    | + | + | 0 | 0 | + | + | + | 5 | 1 |
| Husslien                                       | 2007 | 585 | Atosiban v Other tocolytics    | 0 | + | - | - | + | + | + | 4 | 1 |
| Ingemarsson                                    | 1976 | 30  | Terbutaline v Placebo          | 0 | + | + | + | + | + | + | 6 | 1 |
| Janky                                          | 1990 | 62  | Nifedipine v Ritodrine         | 0 | + | - | - | + | + | + | 4 | 1 |
| Jannet                                         | 1997 | 90  | Nicardipine v Salbutamol       | 0 | 0 | - | 0 | + | - | + | 2 | 0 |
| Kashainian                                     | 2005 | 80  | Atosiban v Nifedipine          | + | 0 | - | 0 | + | + | + | 4 | 1 |
| Kashanian                                      | 2011 | 81  | Nifedipine v Indomethacin      | + | 0 | - | + | + | 0 | + | 4 | 1 |
| Koks                                           | 1998 | 102 | Nifedipine v                   | + | + | - | - | + | + | + | 5 | 1 |

|               |      |     |                                        |   |   |   |   |   |   |   |   |   |
|---------------|------|-----|----------------------------------------|---|---|---|---|---|---|---|---|---|
|               |      |     | Ritodrine                              |   |   |   |   |   |   |   |   |   |
| Kramer        | 1999 | 20  | Sulindac v<br>Terbutaline              | + | + | + | + | + | 0 | + | 6 | 1 |
| Kupferminc    | 1993 | 71  | Nifedipine v<br>Ritodrine              | + | 0 | 0 | 0 | + | + | + | 4 | 1 |
| Kurki         | 1991 | 60  | Indomethacin v<br>Nylidrin             | 0 | + | + | + | + | + | + | 6 | 1 |
| Laohapojanart | 2007 | 40  | Nifedipine v<br>Terbutaline            | 0 | + | - | + | + | + | + | 5 | 1 |
| Larmon        | 1999 | 122 | Nicardipine v<br>Magnesium Sulfate     | + | + | - | - | + | + | + | 5 | 1 |
| Larsen        | 1980 | 136 | Placebo v Ritodrine                    | 0 | 0 | + | + | + | + | + | 5 | 0 |
| Larsen        | 1986 | 99  | Placebo v Ritodrine                    | + | + | + | + | + | 0 | + | 6 | 1 |
| Lauersen      | 1977 | 135 | Ethanol v Ritodrine                    | 0 | 0 | 0 | 0 | + | + | + | 3 | 0 |
| Leveno        | 1986 | 106 | Ritodrine v Placebo                    | + | + | 0 | 0 | + | + | + | 5 | 1 |
| Lin           | 2009 | 45  | Atosiban v Ritodrine                   | + | 0 | - | 0 | + | + | + | 4 | 1 |
| Lorzadeh      | 2007 | 101 | Magnesium Sulfate v<br>HCG             | 0 | 0 | 0 | 0 | + | + | + | 3 | 0 |
| Lyell         | 2007 | 192 | Nifedipine v<br>Magnesium Sulfate      | + | + | 0 | 0 | + | + | + | 5 | 1 |
| Ma            | 1992 | 65  | Placebo v Magnesium<br>Sulfate         | 0 | 0 | 0 | 0 | + | + | + | 3 | 0 |
| Maitra        | 2007 | 70  | Nifedipine v<br>Ritodrine              | - | - | 0 | 0 | + | - | - | 1 | 0 |
| Mawaldi       | 2008 | 174 | Nifedipine v<br>Terbutaline            | + | + | - | - | + | + | + | 5 | 1 |
| McWhorter     | 2004 | 214 | Rofecoxib v<br>Magnesium Sulfate       | + | + | + | + | - | - | + | 5 | 1 |
| Merkatz       | 1980 | 309 | Placebo v Ritodrine                    | 0 | 0 | 0 | 0 | + | + | + | 3 | 0 |
| Miller        | 1982 | 29  | Magnesium Sulfate v<br>Terbutaline     | 0 | + | 0 | 0 | + | + | + | 4 | 1 |
| Mital         | 1992 | 160 | Placebo v Mefenic<br>Acid              | 0 | 0 | + | + | + | + | + | 5 | 0 |
| Mittendorf    | 2002 | 150 | Magnesium Sulfate v<br>Other therapies | + | 0 | + | + | + | + | + | 6 | 1 |
| Morales       | 1989 | 52  | Indomethacin v<br>Ritodrine            | 0 | + | 0 | 0 | - | + | + | 3 | 0 |
| Morales       | 1993 | 101 | Indomethacin v<br>Magnesium Sulfate    | + | + | 0 | 0 | - | + | + | 4 | 1 |
| Motazedian    | 2010 | 200 | Terbutaline v                          | + | + | + | + | + | - | + | 6 | 1 |

|            |      |     |                                                |   |   |   |   |   |   |   |   |   |
|------------|------|-----|------------------------------------------------|---|---|---|---|---|---|---|---|---|
|            |      |     | Salbutamol                                     |   |   |   |   |   |   |   |   |   |
| Moutquin   | 2000 | 247 | Atosiban v Ritodrine                           | + | 0 | + | + | + | + | + | 6 | 1 |
| Nassar     | 2009 | 102 | Nifedipine (high dose) v Nifedipine (low dose) | + | + | - |   | + | + | + | 5 | 1 |
| Neri       | 2009 | 54  | Atosiban v Ritodrine                           | 0 | 0 | 0 | 0 | + | + | + | 3 | 0 |
| Niebyl     | 1980 | 30  | Indomethacin v Placebo                         | + | + | + | + | + | + | + | 7 | 1 |
| Panter     | 1999 | 34  | Placebo v Indomethacin                         | + | + | + | + | + | + | + | 7 | 1 |
| Papatsonis | 1997 | 185 | Nifedipine v Ritodrine                         | + | + | 0 | 0 | + | + | + | 5 | 1 |
| Parilla    | 1997 | 24  | Indomethacin v Magnesium Sulfate               | + | + | 0 | 0 | + | + | + | 5 | 1 |
| Rasanen    | 1995 | 20  | Indomethacin v Sulindac                        | 0 | + | 0 | 0 | + | + | + | 4 | 1 |
| Rayamajhi  | 2003 | 62  | Nifedipine v Isoxsuprine                       | 0 | 0 | 0 | 0 | + | + | + | 3 | 0 |
| Read       | 1986 | 60  | Nifedipine v Ritodrine v Placebo               | 0 | 0 | - | - | + | + | - | 2 | 0 |
| Romero     | 2000 | 501 | Atosiban v Placebo                             | + | + | + | + | + | + | + | 7 | 1 |
| Roy        | 1992 | 40  | Nifedipine v Isoxsuprine                       | 0 | 0 | 0 | 0 | + | 0 | + | 2 | 0 |
| Sawdy      | 2003 | 30  | Sulindac v Nimesulide v Indomethacin           | 0 | + | + | + | + | + | + | 6 | 1 |
| Schorr     | 1999 | 88  | Ketorolac v Magnesium Sulphate                 | + | + | 0 | 0 | + | + | + | 5 | 1 |
| Shim       | 2006 | 128 | Atosiban v Ritodrine                           | + | + | + | + | + | + | + | 7 | 1 |
| Sirohiwal  | 2001 | 60  | Ritodrine v Isoxsuprine                        | - | - | - | 0 | + | + | + | 3 | 0 |
| Smith      | 2007 | 153 | Nitroglycerine v Placebo                       | + | + | + | + | + | + | + | 7 | 1 |
| Spearing   | 1979 | 62  | Alcohol v Indomethacin v Salbutamol            | - | 0 | 0 | 0 | + | + | + | 3 | 0 |
| Spellacy   | 1979 | 29  | Ritodrine v Placebo                            | 0 | 0 | + | + | + | + | + | 5 | 0 |
| Steer      | 1977 | 71  | Magnesium Sulfate v Alcohol v Placebo          | 0 | - | 0 | 0 | + | + | - | 2 | 0 |
| Stika      | 2002 | 24  | Celecoxib v                                    | 0 | + | + | + | + | - | + | 5 | 1 |

|                |      |     |                                 |   |   |   |   |   |   |   |   |   |
|----------------|------|-----|---------------------------------|---|---|---|---|---|---|---|---|---|
|                |      |     | Indomethacin                    |   |   |   |   |   |   |   |   |   |
| Surichamorn    | 2001 | 96  | Magnesium Sulfate v Terbutaline | 0 | + | 0 | 0 | + | + | + | 4 | 1 |
| Taherian       | 2006 | 120 | Nifedipine v Magnesium Sulfate  | + | 0 | 0 | 0 | + | + | + | 4 | 1 |
| Tchilinguirian | 1984 | 48  | Magnesium Sulfate v Ritodrine   | 0 | 0 | 0 | 0 | + | + | + | 3 | 0 |
| Thornton       | 2009 | 163 | Barusiban v Placebo             | + | + | + | 0 | + | + | + | 6 | 1 |
| Trabelsi       | 2008 | 48  | Nicardipine v Salbutamol        | 0 | + | - | 0 | + | + | + | 4 | 1 |
| Van de Water   | 2008 | 91  | Nifedipine v Ritodrine          | + | + | 0 | 0 | + | + | + | 5 | 1 |
| Wang           | 2000 | 71  | Magnesium Sulfate v Ritodrine   | 0 | 0 | 0 | 0 | + | + | + | 3 | 0 |
| Weerakul       | 2002 | 89  | Nifedipine v Terbutaline        | + | 0 | 0 | 0 | + | - | + | 3 | 0 |
| Weiner         | 1988 | 75  | Placebo v Tocolysis             | + | + | 0 | 0 | + | + | + | 5 | 1 |
| Wilkins        | 1988 | 120 | Magnesium Sulfate v Ritodrine   | + | + | 0 | 0 | + | + | + | 5 | 1 |
| Zhu            | 1996 | 126 | Magnesium Sulfate v Ritodrine   | 0 | 0 | 0 | 0 | + | + | + | 3 | 0 |
| Zuckerman      | 1984 | 36  | Indomethacin v Placebo          | 0 | 0 | + | + | + | + | + | 5 | 0 |

For risk of bias assessments: + = adequate for that category, 0 = unclear, - = inadequate for that category. The Quality score is the number of + out of 7 for that trial. The overall Quality Assessment is given a 1=adequate overall quality or 0= inadequate overall quality if at least 4 of the domains are adequate with at least 1 being in the Sequence generation or Allocation concealment categories.
