# Supplementary material
Source: PubMed Central journal article supplement (PMC4784543)
Supplement: haad004821.wt2_default.pdf [file haad004821.wt2_default.pdf]

## Appendix two: tables of results from pairwise meta-analyses

Tables report pairwise posterior median odds ratios and 95% credible intervals obtained from WinBUGS analyses.  $I^2$  reported as a measure of between trial heterogeneity and the p-value for the  $\chi^2$  test for homogeneity. Reported for all four outcomes: 48-hour delay pre-term delivery, Neonatal mortality, Neonatal respiratory distress syndrome and all cause maternal side effect. Heterogeneity statistics reported for trials with  $\leq 3$  trials.

| 48-hour delay delivery |             |           |                      |               |                     |
|------------------------|-------------|-----------|----------------------|---------------|---------------------|
| Comparison             |             | Trials    | Odds ratio (95% CrI) |               | $I^2$ % and p-value |
| Active                 | Control     |           |                      |               |                     |
| Betamimetic            | Placebo     | 4 trials  | 3.37                 | (0.96, 16.05) | 56.1% p=0.077       |
| PI                     | Placebo     | 2 trials  | 14.57                | (4.30, 60.85) | Not estimated       |
| MS                     | Placebo     | 3 trials  | 2.69                 | (0.37, 19.73) | 95.4% p<0.001       |
| ORB                    | Placebo     | 2 trials  | 1.51                 | (1.06, 2.15)  | Not estimated       |
| Nitrates               | Placebo     | 1 trial   | 1.13                 | (0.54, 2.38)  | Not estimated       |
| PI                     | Betamimetic | 3 trials  | 3.04                 | (0.77, 12.73) | 0% p= 0.905         |
| CCB                    | Betamimetic | 14 trials | 1.12                 | (0.70, 1.76)  | 28.2% p=0.154       |
| MS                     | Betamimetic | 8 trials  | 1.09                 | (0.51, 2.16)  | 7.7% P=0.371        |
| ORB                    | Betamimetic | 6 trials  | 0.89                 | (0.52, 1.53)  | 0% p= 0.988         |
| CCB                    | PI          | 1 trial   | 79.82                | (5.50, 35120) | Not estimated       |
| MS                     | PI          | 3 trials  | 0.85                 | (0.24, 2.95)  | 0% p=0.397          |
| Nitrates               | CCB         | 1 trial   | 0.77                 | (0.13, 4.08)  | Not estimated       |
| MS                     | CCB         | 5 trials  | 0.88                 | (0.46, 1.80)  | 0% p=0.971          |
| MS                     | Other       | 1 trial   | 1.46                 | (0.42, 5.38)  | Not estimated       |

| Neonatal mortality |             |          |                      |               |                     |
|--------------------|-------------|----------|----------------------|---------------|---------------------|
| Comparison         |             | Trials   | Odds ratio (95% CrI) |               | $I^2$ % and p-value |
| Active             | Control     |          |                      |               |                     |
| Betamimetic        | Placebo     | 6 trials | 0.39                 | (0.10, 1.42)  | 78.1% p< 0.001      |
| PI                 | Placebo     | 3 trials | 1.08                 | (0.14, 10.03) | 0% P=0.646          |
| MS                 | Placebo     | 3 trials | 1.08                 | (0.15, 6.82)  | 51.8% P=0.125       |
| ORB                | Placebo     | 1 trial  | 4.74                 | (1.12, 34.19) | Not estimated       |
| PI                 | Betamimetic | 2 trials | 1.05                 | (0.18, 6.22)  | Not estimated       |
| CCB                | Betamimetic | 8 trials | 0.56                 | (0.13, 2.00)  | 0% p=0.934          |
| Others             | Betamimetic | 2 trials | 3.63                 | (1.15, 14.11) | Not estimated       |
| MS                 | Betamimetic | 3 trials | 1.16                 | (0.18, 6.44)  | 0% p=0.659          |
| ORB                | Betamimetic | 5 trials | 0.62                 | (0.17, 1.92)  | 0% p=0.669          |
| CCB                | PI          | 1 trial  | 0.05                 | (0.00, 1.02)  | Not estimated       |
| MS                 | PI          | 3 trials | 3.16                 | (0.35, 43.64) | 0% p= 0.417         |
| MS                 | CCB         | 2 trials | 0.4                  | (0.01, 5.26)  | Not estimated       |
| ORB                | CCB         | 1 trial  | 1.16                 | (0.29, 4.79)  | Not estimated       |

| Respiratory distress syndrome |             |          |                      |              |                              |
|-------------------------------|-------------|----------|----------------------|--------------|------------------------------|
| Comparison                    |             | Trials   | Odds ratio (95% CrI) |              | I <sup>2</sup> % and p-value |
| Active                        | Control     |          |                      |              |                              |
| Betamimetic                   | Placebo     | 6 trials | 0.62                 | (0.28, 1.02) | 0% p=0.495                   |
| PI                            | Placebo     | 3 trials | 0.99                 | (0.16, 5.68) | 30% p=0.240                  |
| MS                            | Placebo     | 2 trials | 1.04                 | (0.52, 2.07) | Not estimated                |
| ORB                           | Placebo     | 2 trials | 1.36                 | (0.92, 2.04) | Not estimated                |
| PI                            | Betamimetic | 2 trials | 0.79                 | (0.32, 1.87) | Not estimated                |
| CCB                           | Betamimetic | 7 trials | 0.65                 | (0.32, 1.42) | 0% p=0.886                   |
| Others                        | Betamimetic | 1 trial  | 2.84                 | (1.06, 8.49) | Not estimated                |
| MS                            | Betamimetic | 2 trials | 1.78                 | (0.55, 6.18) | Not estimated                |
| ORB                           | Betamimetic | 5 trials | 0.90                 | (0.34, 3.14) | 6.3% p=0.371                 |
| MS                            | PI          | 4 trials | 1.01                 | (0.40, 2.72) | 0% p=0.790                   |
| MS                            | CCB         | 2 trials | 1.18                 | (0.66, 2.15) | Not estimated                |
| ORB                           | CCB         | 2 trials | 0.84                 | (0.41, 1.70) | Not estimated                |
| MS                            | Other       | 1 trial  | 0.99                 | (0.35, 2.79) | Not estimated                |

| Maternal side effects (all cause) |             |           |                      |                     |                              |
|-----------------------------------|-------------|-----------|----------------------|---------------------|------------------------------|
| Comparison                        |             | Trials    | Odds ratio (95% CrI) |                     | I <sup>2</sup> % and p-value |
| Active                            | Control     |           |                      |                     |                              |
| Betamimetic                       | Placebo     | 4 trials  | 12.26                | (3.66, 61.03)       | 37.8% p=0.186                |
| PI                                | Placebo     | 2 trials  | 2.31                 | (0.62, 9.60)        | Not estimated                |
| CCB                               | Placebo     | 1 trial   | 2.91E+08             | (389.2, 1.40E+26)   | Not estimated                |
| MS                                | Placebo     | 1 trial   | 8.2                  | (1.30E+6, 1.73e+17) | Not estimated                |
| ORB                               | Placebo     | 2 trials  | 2.08                 | (1.24, 3.55)        | Not estimated                |
| Nitrates                          | Placebo     | 1 trial   | 2.27                 | (1.18, 4.43)        | Not estimated                |
| PI                                | Betamimetic | 4 trials  | 0.05                 | (0.01, 0.19)        | 20.3% p=0.288                |
| CCB                               | Betamimetic | 15 trials | 0.14                 | (0.05, 0.36)        | 81.1% p<0.001                |
| MS                                | Betamimetic | 6 trial   | 0.45                 | (0.11, 1.17)        | 87.0% p<0.001                |
| ORB                               | Betamimetic | 6 trials  | 0.05                 | (0.03, 0.14)        | 51.4% p=0.067                |
| CCB                               | PI          | 1 trial   | 2.25                 | (0.90, 5.95)        | Not estimated                |
| MS                                | PI          | 3 trials  | 3.02                 | (0.44, 27.95)       | 88.3% p<0.001                |
| Nitrates                          | CCB         | 1 trial   | 2.08                 | (0.59, 8.19)        | Not estimated                |
| MS                                | CCB         | 5 trials  | 1.79                 | (0.52, 5.57)        | 71.7% p=0.007                |
| ORB                               | CCB         | 2 trials  | 0.91                 | (0.45, 1.84)        | Not estimated                |
| Nitrates                          | MS          | 1 trial   | 8.12                 | (0.92, 243.2)       | Not estimated                |
