# Supplementary material
Source: PubMed Central journal article supplement (PMC4784543)
Supplement: haad004821.wt3_default.pdf [file haad004821.wt3_default.pdf]

**48 hours delay**

|                            | <b>Predicted Log odds ratio</b> | <b>Lower Predictive CrI</b> | <b>Upper predictive CrI</b> |
|----------------------------|---------------------------------|-----------------------------|-----------------------------|
| Betamimetics               | 0.94                            | -0.49                       | 2.41                        |
| Prostaglandin Inhibitors   | 1.69                            | 0.13                        | 3.26                        |
| Calcium Channel Blockers   | 1.05                            | -0.44                       | 2.56                        |
| Others                     | 0.73                            | -1.17                       | 2.64                        |
| Nitrates                   | 0.37                            | -1.40                       | 2.15                        |
| Oxytocin Receptor blockers | 0.74                            | -0.55                       | 2.08                        |
| Magnesium Sulfate          | 1.06                            | -0.20                       | 2.37                        |

**Maternal side effects**

|                            | <b>Predicted Log odds ratio</b> | <b>Lower Predictive CrI</b> | <b>Upper predictive CrI</b> |
|----------------------------|---------------------------------|-----------------------------|-----------------------------|
| Betamimetics               | 3.09                            | 0.30                        | 5.96                        |
| Prostaglandin Inhibitors   | 0.46                            | -2.51                       | 3.44                        |
| Calcium Channel Blockers   | 1.35                            | -1.53                       | 4.36                        |
| Nitrates                   | 1.13                            | -2.11                       | 4.35                        |
| Magnesium Sulfate          | 2.12                            | -0.54                       | 4.83                        |
| Oxytocin Receptor blockers | 0.66                            | -1.99                       | 3.34                        |

**Respiratory distress syndrome**

|                            | <b>Predicted Log odds ratio</b> | <b>Lower Predictive CrI</b> | <b>Upper predictive CrI</b> |
|----------------------------|---------------------------------|-----------------------------|-----------------------------|
| Betamimetics               | -0.18                           | -1.22                       | 0.86                        |
| Prostaglandin Inhibitors   | -0.16                           | -1.36                       | 0.94                        |
| Calcium Channel Blockers   | -0.33                           | -1.46                       | 0.79                        |
| Other                      | 0.43                            | -0.91                       | 1.75                        |
| Oxytocin Receptor blockers | -0.13                           | -0.97                       | 0.64                        |
| Magnesium Sulfate          | -0.01                           | -0.85                       | 0.83                        |

**Neonatal mortality**

|                            | <b>Predicted Log odds ratio</b> | <b>Lower Predictive CrI</b> | <b>Upper predictive CrI</b> |
|----------------------------|---------------------------------|-----------------------------|-----------------------------|
| Betamimetics               | -0.48                           | -3.91                       | 2.79                        |
| Prostaglandin Inhibitors   | -0.57                           | -4.71                       | 3.09                        |
| Calcium Channel Blockers   | -0.95                           | -3.63                       | 1.63                        |
| Other                      | 1.04                            | -2.12                       | 4.33                        |
| Oxytocin Receptor blockers | -0.48                           | -3.12                       | 2.10                        |
| Magnesium Sulfate          | -0.01                           | -2.54                       | 2.52                        |

Appendix Table 4: The predicted treatment effect (log odds ratio) and 95% prediction interval for a new study on a randomly chosen drug from each class, for outcomes 48-hour delay, Neonatal mortality, maternal side effects (all cause) and respiratory distress syndrome. Each class is compared to a placebo/ no treatment comparator.
