# Supplementary material
Source: PubMed Central journal article supplement (PMC4784543)
Supplement: haad004821.wt4_default.pdf [file haad004821.wt4_default.pdf]

Appendix Table 5 (alternative to figure): Representation of the trials included in the Network Meta-Analysis of tocolytic therapy for preterm labor

|                                          | <b>Other</b> | <b>ORBs</b> | <b>Nitrate</b> | <b>PI</b> | <b>Mag</b> | <b>CCB</b> | <b>Betamimetics</b> |
|------------------------------------------|--------------|-------------|----------------|-----------|------------|------------|---------------------|
| <b>Placebo</b>                           |              | 3 (776)     | 1 (153)        | 4 (260)   | 5 (350)    |            | 11 (1749)           |
| <b>Betamimetics</b>                      | 2 (177)      | 9 (1661)    | 1 (236)        | 3 (186)   | 11 (809)   | 18 (1386)  |                     |
| <b>Calcium channel blockers (CCB)</b>    |              | 2 (143)     | 1 (50)         | 1 (81)    | 6 (678)    |            |                     |
| <b>Magnesium sulfate (Mag)</b>           | 3 (255)      |             | 1 (30)         | 5 (531)   |            |            |                     |
| <b>Prostaglandin inhibitors (PI)</b>     |              |             |                |           |            |            |                     |
| <b>Nitrate</b>                           |              |             |                |           |            |            |                     |
| <b>Oxytocin receptor blockers (ORBs)</b> | 1 (585)      |             |                |           |            |            |                     |
