# Supplementary material
Source: PubMed Central journal article supplement (PMC4784543)
Supplement: haad004821.ww1_default.pdf [file haad004821.ww1_default.pdf]

$$\hat{\mu}_{BC}^{\text{indirect}} = \hat{\mu}_{AC}^{\text{Direct}} - \hat{\mu}_{AB}^{\text{Direct}}$$

where  $\hat{\mu}$  is the observed treatment effect
